# Supplementary material for: Differential transcriptome response of blood brain barrier spheroids to neuroinvasive Neisseria and Borrelia
Source: Front Cell Infect Microbiol. 2023 Dec 19;13:1326578. doi: 10.3389/fcimb.2023.1326578 (PMC10766361; doi:10.3389/fcimb.2023.1326578)
Supplement: Supplementary file 3 [file DataSheet_3.xlsx]

## Sheet: Relationship between DEGs
Commonly expressed DEGs - up regulated during Neisseria infection and downregulated during Borrelia infection				Commonly expressed DEGs - up regulated during Borrelia infection and downregulated during Neisseria infection				Exclusively upregulated DEGS during Neisseria infection				Exclusively downregulated DEGS during Neisseria infection				Exclusively upregulated DEGS during Borrelia infection				Exclusively downregulated DEGS during Borrelia infection
S. No.	Ensembl ID	Gene name		S.No.	Ensembl ID	Gene name		S.No.	Ensembl ID	Gene names		S.No.	Ensembl ID	Gene name		S.No.	Ensembl ID	Gene name		S.No.	Ensembl ID	Gene name
1	ENSG00000147256	ARHGAP36		1	ENSG00000124107	SLPI		1	ENSG00000066735	KIF26A		1	ENSG00000144119	C1QL2		1	ENSG00000100678	SLC8A3		1	ENSG00000077616	NAALAD2
2	ENSG00000152977	ZIC1		2	ENSG00000230432	AC114803.1		2	ENSG00000134215	VAV3		2	ENSG00000112812	PRSS16		2	ENSG00000159337	PLA2G4D		2	ENSG00000259020	AL049872.1
3	ENSG00000186960	LINC01551		3	ENSG00000198915	RASGEF1A		3	ENSG00000163827	LRRC2		3	ENSG00000131730	CKMT2		3	ENSG00000167419	LPO		3	ENSG00000104313	EYA1
4	ENSG00000176165	FOXG1		4	ENSG00000087250	MT3		4	ENSG00000229344	MTCO2P12		4	ENSG00000162069	BICDL2		4	ENSG00000229644	NAMPTP1		4	ENSG00000112218	GPR63
5	ENSG00000186297	GABRA5		5	ENSG00000116014	KISS1R		5	ENSG00000259644	AC022613.3		5	ENSG00000176177	ENTHD1		5	ENSG00000179148	ALOXE3		5	ENSG00000166387	PPFIBP2
6	ENSG00000187398	LUZP2		6	ENSG00000198729	PPP1R14C		6	ENSG00000141668	CBLN2		6	ENSG00000267710	EDDM13		6	ENSG00000008735	MAPK8IP2		6	ENSG00000150510	FAM124A
7	ENSG00000137273	FOXF2		7	ENSG00000124102	PI3		7	ENSG00000185269	NOTUM		7	ENSG00000183734	ASCL2		7	ENSG00000197181	PIWIL2		7	ENSG00000128594	LRRC4
8	ENSG00000145681	HAPLN1		8	ENSG00000163737	PF4		8	ENSG00000135097	MSI1		8	ENSG00000204632	HLA-G		8	ENSG00000163958	ZDHHC19		8	ENSG00000213025	COX20P1
9	ENSG00000261189	AL031058.1		9	ENSG00000186642	PDE2A		9	ENSG00000143869	GDF7		9	ENSG00000225889	AC012368.1		9	ENSG00000115009	CCL20		9	ENSG00000187987	ZSCAN23
10	ENSG00000121570	DPPA4		10	ENSG00000163083	INHBB		10	ENSG00000279880	AC134407.3		10	ENSG00000113296	THBS4		10	ENSG00000182472	CAPN12		10	ENSG00000153208	MERTK
11	ENSG00000075340	ADD2		11	ENSG00000138615	CILP		11	ENSG00000171873	ADRA1D		11	ENSG00000277918	RF00003		11	ENSG00000121207	LRAT		11	ENSG00000172733	PURG
12	ENSG00000164116	GUCY1A1		12	ENSG00000174697	LEP		12	ENSG00000255823	MTRNR2L8		12	ENSG00000267577	AC010327.3		12	ENSG00000250251	PKD1P6		12	ENSG00000173114	LRRN3
13	ENSG00000148948	LRRC4C		13	ENSG00000246363	LINC02458		13	ENSG00000085741	WNT11		13	ENSG00000155926	SLA		13	ENSG00000158813	EDA		13	ENSG00000101115	SALL4
14	ENSG00000164093	PITX2		14	ENSG00000124212	PTGIS		14	ENSG00000278926	AC092134.2		14	ENSG00000140519	RHCG		14	ENSG00000039139	DNAH5		14	ENSG00000152495	CAMK4
15	ENSG00000120278	PLEKHG1		15	ENSG00000132821	VSTM2L		15	ENSG00000252062	RNU6-469P		15	ENSG00000164266	SPINK1		15	ENSG00000232774	AL355916.1		15	ENSG00000170745	KCNS3
16	ENSG00000260244	AC104083.1		16	ENSG00000254403	OR10Y1P		16	ENSG00000169245	CXCL10		16	ENSG00000142583	SLC2A5		16	ENSG00000185955	C7orf61		16	ENSG00000196632	WNK3
17	ENSG00000163064	EN1		17	ENSG00000118972	FGF23		17	ENSG00000144868	TMEM108		17	ENSG00000217716	RPS10P3		17	ENSG00000170681	CAVIN4		17	ENSG00000189320	FAM180A
18	ENSG00000111262	KCNA1		18	ENSG00000101210	EEF1A2		18	ENSG00000280216	AL022326.2		18	ENSG00000161896	IP6K3		18	ENSG00000276966	HIST1H4E		18	ENSG00000261308	FIGNL2
19	ENSG00000107105	ELAVL2		19	ENSG00000270722	RF00003		19	ENSG00000226806	AC011893.1		19	ENSG00000100593	ISM2		19	ENSG00000167207	NOD2		19	ENSG00000104722	NEFM
20	ENSG00000137745	MMP13		20	ENSG00000172137	CALB2		20	ENSG00000178662	CSRNP3		20	ENSG00000271119	AC026412.3		20	ENSG00000128165	ADM2		20	ENSG00000156140	ADAMTS3
21	ENSG00000172201	ID4		21	ENSG00000147689	FAM83A		21	ENSG00000006283	CACNA1G		21	ENSG00000183421	RIPK4		21	ENSG00000284681	AC007240.1		21	ENSG00000158966	CACHD1
22	ENSG00000111728	ST8SIA1		22	ENSG00000179593	ALOX15B		22	ENSG00000108691	CCL2		22	ENSG00000259448	LINC02352		22	ENSG00000249042	AC008771.1		22	ENSG00000235859	AC006978.1
23	ENSG00000049540	ELN		23	ENSG00000163017	ACTG2		23	ENSG00000154856	APCDD1		23	ENSG00000125895	TMEM74B		23	ENSG00000077420	APBB1IP		23	ENSG00000145358	DDIT4L
24	ENSG00000228203	RNF144A-AS1		24	ENSG00000130822	PNCK		24	ENSG00000267194	lncRNA		24	ENSG00000167600	CYP2S1		24	ENSG00000006638	TBXA2R		24	ENSG00000167992	VWCE
25	ENSG00000180044	C3orf80		25	ENSG00000111339	ART4		25	ENSG00000271216	LINC01050		25	ENSG00000111254	AKAP3		25	ENSG00000169429	CXCL8		25	ENSG00000114279	FGF12
26	ENSG00000099139	PCSK5		26	ENSG00000109846	CRYAB		26	ENSG00000198948	MFAP3L		26	ENSG00000145911	N4BP3		26	ENSG00000158859	ADAMTS4		26	ENSG00000259539	AC051619.6
27	ENSG00000180875	GREM2		27	ENSG00000123977	DAW1		27	ENSG00000207105	RF00019		27	ENSG00000135346	CGA		27	ENSG00000136943	CTSV		27	ENSG00000155974	GRIP1
28	ENSG00000155966	AFF2		28	ENSG00000127129	EDN2		28	ENSG00000142149	HUNK		28	ENSG00000270321	AC007953.2		28	ENSG00000167642	SPINT2		28	ENSG00000230177	AL080317.1
29	ENSG00000150471	ADGRL3		29	ENSG00000165474	GJB2		29	ENSG00000151790	TDO2		29	ENSG00000105613	MAST1		29	ENSG00000105339	DENND3		29	ENSG00000175084	DES
30	ENSG00000164742	ADCY1		30	ENSG00000074211	PPP2R2C		30	ENSG00000170549	IRX1		30	ENSG00000077092	RARB		30	ENSG00000163909	HEYL		30	ENSG00000130413	STK33
31	ENSG00000149294	NCAM1		31	ENSG00000073861	TBX21		31	ENSG00000212232	SNORD17		31	ENSG00000200156	RNU5B-1		31	ENSG00000187764	SEMA4D		31	ENSG00000259775	AL138976.2
32	ENSG00000164379	FOXQ1		32	ENSG00000137462	TLR2		32	ENSG00000233237	LINC00472		32	ENSG00000253633	AP002852.1		32	ENSG00000279118	AC093535.2		32	ENSG00000136960	ENPP2
33	ENSG00000129009	ISLR		33	ENSG00000111913	RIPOR2		33	ENSG00000279281	AC015883.1		33	ENSG00000123576	ESX1		33	ENSG00000101311	FERMT1		33	ENSG00000147100	SLC16A2
34	ENSG00000271811	Z97200.1		34	ENSG00000136842	TMOD1		34	ENSG00000107518	ATRNL1		34	ENSG00000235652	AL356599.1		34	ENSG00000182870	GALNT9		34	ENSG00000182580	EPHB3
35	ENSG00000115718	PROC		35	ENSG00000239911	PRKAG2-AS1		35	ENSG00000111215	PRR4		35	ENSG00000229647	MYOSLID		35	ENSG00000105650	PDE4C		35	ENSG00000221164	SNORA11F
36	ENSG00000124406	ATP8A1		36	ENSG00000113083	LOX		36	ENSG00000251348	HSPD1P11		36	ENSG00000117266	CDK18		36	ENSG00000101442	ACTR5		36	ENSG00000158270	COLEC12
37	ENSG00000163032	VSNL1		37	ENSG00000112379	ARFGEF3		37	ENSG00000261596	AC005632.2		37	ENSG00000162496	DHRS3		37	ENSG00000166689	PLEKHA7		37	ENSG00000223414	LINC00473
38	ENSG00000005001	PRSS22		38	ENSG00000105717	PBX4		38	ENSG00000144339	TMEFF2		38	ENSG00000231249	ITPR1-AS1		38	ENSG00000163661	PTX3		38	ENSG00000213760	ATP6V1G2
39	ENSG00000138696	BMPR1B		39	ENSG00000145708	CRHBP		39	ENSG00000047365	ARAP2		39	ENSG00000115155	OTOF		39	ENSG00000100234	TIMP3		39	ENSG00000086991	NOX4
40	ENSG00000162981	FAM84A		40	ENSG00000115602	IL1RL1		40	ENSG00000201662	RNU6-60P		40	ENSG00000280237	MIR4697HG		40	ENSG00000101187	SLCO4A1		40	ENSG00000109576	AADAT
41	ENSG00000121361	KCNJ8		41	ENSG00000205129	C4orf47		41	ENSG00000198879	SFMBT2		41	ENSG00000261594	TPBGL		41	ENSG00000149591	TAGLN		41	ENSG00000187634	SAMD11
42	ENSG00000107736	CDH23		42	ENSG00000248187	AC078850.1		42	ENSG00000248927	AC114284.1		42	ENSG00000109193	SULT1E1		42	ENSG00000152049	KCNE4		42	ENSG00000225630	MTND2P28
43	ENSG00000155011	DKK2		43	ENSG00000198910	L1CAM		43	ENSG00000126016	AMOT		43	ENSG00000105877	DNAH11		43	ENSG00000125319	C17orf53		43	ENSG00000166394	CYB5R2
44	ENSG00000042062	RIPOR3		44	ENSG00000109906	ZBTB16		44	ENSG00000273174	AC108673.2		44	ENSG00000250548	LINC01303		44	ENSG00000242516	LINC00960		44	ENSG00000152217	SETBP1
45	ENSG00000250722	SELENOP		45	ENSG00000134339	SAA2		45	ENSG00000184408	KCND2		45	ENSG00000115590	IL1R2		45	ENSG00000128591	FLNC		45	ENSG00000126709	IFI6
46	ENSG00000171517	LPAR3		46	ENSG00000118785	SPP1		46	ENSG00000271133	AC004130.1		46	ENSG00000042832	TG		46	ENSG00000128510	CPA4		46	ENSG00000137727	ARHGAP20
47	ENSG00000137809	ITGA11		47	ENSG00000128242	GAL3ST1		47	ENSG00000253522	MIR3142HG		47	ENSG00000151882	CCL28		47	ENSG00000187583	PLEKHN1		47	ENSG00000251136	AF117829.1
48	ENSG00000145526	CDH18		48	ENSG00000260549	MT1L		48	ENSG00000136514	RTP4		48	ENSG00000249679	AC106897.1		48	ENSG00000006016	CRLF1		48	ENSG00000064205	WISP2
49	ENSG00000221866	PLXNA4		49	ENSG00000186994	KANK3		49	ENSG00000279407	AC007191.1		49	ENSG00000101850	GPR143		49	ENSG00000269397	AC011503.2		49	ENSG00000184985	SORCS2
50	ENSG00000151117	TMEM86A		50	ENSG00000057294	PKP2		50	ENSG00000174460	ZCCHC12		50	ENSG00000256546	AC156455.1		50	ENSG00000105835	NAMPT		50	ENSG00000198108	CHSY3
51	ENSG00000170571	EMB		51	ENSG00000111859	NEDD9		51	ENSG00000110848	CD69		51	ENSG00000166323	C11orf65		51	ENSG00000162706	CADM3		51	ENSG00000109339	MAPK10
52	ENSG00000143333	RGS16		52	ENSG00000129990	SYT5		52	ENSG00000188501	LCTL		52	ENSG00000198028	ZNF560		52	ENSG00000008517	IL32		52	ENSG00000267280	TBX2-AS1
53	ENSG00000118946	PCDH17		53	ENSG00000175040	CHST2		53	ENSG00000162692	VCAM1		53	ENSG00000165507	DEPP1		53	ENSG00000187908	DMBT1		53	ENSG00000213420	GPC2
54	ENSG00000280219	AC093908.1		54	ENSG00000151651	ADAM8		54	ENSG00000129244	ATP1B2		54	ENSG00000185436	IFNLR1		54	ENSG00000174939	ASPHD1		54	ENSG00000167549	CORO6
55	ENSG00000164035	EMCN		55	ENSG00000107159	CA9		55	ENSG00000134533	RERG		55	ENSG00000278238	AL359513.1		55	ENSG00000127666	TICAM1		55	ENSG00000165152	TMEM246
56	ENSG00000137573	SULF1		56	ENSG00000064886	CHI3L2		56	ENSG00000252498	RNU6-1016P		56	ENSG00000205771	CATSPER2P1		56	ENSG00000169220	RGS14		56	ENSG00000164418	GRIK2
57	ENSG00000153234	NR4A2		57	ENSG00000080031	PTPRH		57	ENSG00000148541	FAM13C		57	ENSG00000179859	RNF227		57	ENSG00000259207	ITGB3		57	ENSG00000076770	MBNL3
58	ENSG00000165197	VEGFD		58	ENSG00000166165	CKB		58	ENSG00000203706	SERTAD4-AS1		58	ENSG00000209082	MT-TL1		58	ENSG00000103710	RASL12		58	ENSG00000168077	SCARA3
59	ENSG00000138316	ADAMTS14		59	ENSG00000185633	NDUFA4L2		59	ENSG00000175984	DENND2C		59	ENSG00000185442	FAM174B		59	ENSG00000120833	SOCS2		59	ENSG00000103034	NDRG4
60	ENSG00000166482	MFAP4		60	ENSG00000006606	CCL26		60	ENSG00000200345	RNU6-485P		60	ENSG00000257732	AC089983.1		60	ENSG00000149380	P4HA3		60	ENSG00000139910	NOVA1
61	ENSG00000147180	ZNF711		61	ENSG00000117525	F3		61	ENSG00000162654	GBP4		61	ENSG00000158315	RHBDL2		61	ENSG00000154102	C16orf74		61	ENSG00000148344	PTGES
62	ENSG00000106123	EPHB6		62	ENSG00000102802	MEDAG		62	ENSG00000276517	AL133243.3		62	ENSG00000109107	ALDOC		62	ENSG00000132329	RAMP1		62	ENSG00000103489	XYLT1
63	ENSG00000143469	SYT14		63	ENSG00000171557	FGG		63	ENSG00000196932	TMEM26		63	ENSG00000121966	CXCR4		63	ENSG00000163734	CXCL3		63	ENSG00000005471	ABCB4
64	ENSG00000138759	FRAS1		64	ENSG00000164674	SYTL3		64	ENSG00000103742	IGDCC4		64	ENSG00000251580	LINC02482		64	ENSG00000163739	CXCL1		64	ENSG00000146859	TMEM140
65	ENSG00000145794	MEGF10		65	ENSG00000157514	TSC22D3		65	ENSG00000126785	RHOJ		65	ENSG00000164124	TMEM144		65	ENSG00000173221	GLRX		65	ENSG00000264229	RNU4ATAC
66	ENSG00000187955	COL14A1		66	ENSG00000105048	TNNT1		66	ENSG00000163449	TMEM169		66	ENSG00000189221	MAOA		66	ENSG00000148426	PROSER2		66	ENSG00000182272	B4GALNT4
67	ENSG00000120658	ENOX1		67	ENSG00000163735	CXCL5		67	ENSG00000184949	FAM227A		67	ENSG00000233117	LINC00702		67	ENSG00000120756	PLS1		67	ENSG00000180190	TDRP
68	ENSG00000183160	TMEM119		68	ENSG00000106366	SERPINE1		68	ENSG00000177409	SAMD9L		68	ENSG00000125148	MT2A		68	ENSG00000119929	CUTC		68	ENSG00000142408	CACNG8
69	ENSG00000142611	PRDM16		69	ENSG00000173432	SAA1		69	ENSG00000138646	HERC5		69	ENSG00000170684	ZNF296						69	ENSG00000204442	FAM155A
70	ENSG00000134321	RSAD2		70	ENSG00000100985	MMP9		70	ENSG00000130203	APOE		70	ENSG00000215866	LINC01356						70	ENSG00000092621	PHGDH
71	ENSG00000150636	CCDC102B		71	ENSG00000007516	BAIAP3		71	ENSG00000240409	MTATP8P1		71	ENSG00000107738	VSIR						71	ENSG00000157680	DGKI
72	ENSG00000198865	CCDC152		72	ENSG00000104415	WISP1		72	ENSG00000276600	RAB7B		72	ENSG00000152463	OLAH						72	ENSG00000270885	RASL10B
73	ENSG00000103449	SALL1		73	ENSG00000273802	HIST1H2BG		73	ENSG00000264379	RF00157		73	ENSG00000076554	TPD52						73	ENSG00000154122	ANKH
74	ENSG00000140807	NKD1		74	ENSG00000160161	CILP2		74	ENSG00000148680	HTR7		74	ENSG00000116833	NR5A2						74	ENSG00000164056	SPRY1
75	ENSG00000139220	PPFIA2		75	ENSG00000178776	C5orf46		75	ENSG00000101004	NINL		75	ENSG00000104812	GYS1						75	ENSG00000159164	SV2A
76	ENSG00000134326	CMPK2		76	ENSG00000134107	BHLHE40		76	ENSG00000133106	EPSTI1		76	ENSG00000086544	ITPKC						76	ENSG00000162437	RAVER2
77	ENSG00000165379	LRFN5		77	ENSG00000105376	ICAM5		77	ENSG00000162407	PLPP3		77	ENSG00000183578	TNFAIP8L3						77	ENSG00000124766	SOX4
78	ENSG00000218336	TENM3		78	ENSG00000129521	EGLN3		78	ENSG00000115008	IL1A		78	ENSG00000154027	AK5						78	ENSG00000224982	TMEM233
79	ENSG00000182636	NDN		79	ENSG00000248626	GAPDHP40		79	ENSG00000164949	GEM		79	ENSG00000259768	AC004943.2						79	ENSG00000198963	RORB
80	ENSG00000162849	KIF26B		80	ENSG00000183691	NOG		80	ENSG00000123570	RAB9B		80	ENSG00000144152	FBLN7						80	ENSG00000204131	NHSL2
81	ENSG00000152402	GUCY1A2		81	ENSG00000204128	C2orf72		81	ENSG00000139173	TMEM117		81	ENSG00000237512	UNC5B-AS1						81	ENSG00000182621	PLCB1
82	ENSG00000008118	CAMK1G		82	ENSG00000154917	RAB6B		82	ENSG00000132530	XAF1		82	ENSG00000104419	NDRG1						82	ENSG00000067113	PLPP1
83	ENSG00000158321	AUTS2		83	ENSG00000095303	PTGS1		83	ENSG00000144891	AGTR1		83	ENSG00000180448	ARHGAP45						83	ENSG00000121989	ACVR2A
84	ENSG00000105894	PTN		84	ENSG00000156466	GDF6		84	ENSG00000182168	UNC5C		84	ENSG00000219607	PPP1R3G						84	ENSG00000116117	PARD3B
85	ENSG00000157502	MUM1L1		85	ENSG00000161653	NAGS		85	ENSG00000250461	AC122718.1		85	ENSG00000148677	ANKRD1						85	ENSG00000171724	VAT1L
86	ENSG00000165105	RASEF		86	ENSG00000153531	ADPRHL1		86	ENSG00000235961	PNMA6A		86	ENSG00000148225	WDR31						86	ENSG00000222022	AC112721.1
87	ENSG00000091879	ANGPT2		87	ENSG00000116285	ERRFI1		87	ENSG00000078401	EDN1		87	ENSG00000138131	LOXL4						87	ENSG00000151067	CACNA1C
88	ENSG00000005108	THSD7A		88	ENSG00000174640	SLCO2A1		88	ENSG00000173269	MMRN2		88	ENSG00000017483	SLC38A5						88	ENSG00000128564	VGF
89	ENSG00000132854	KANK4		89	ENSG00000062282	DGAT2		89	ENSG00000200834	RF00019		89	ENSG00000166106	ADAMTS15						89	ENSG00000174004	NRROS
90	ENSG00000119699	TGFB3		90	ENSG00000124731	TREM1		90	ENSG00000170624	SGCD		90	ENSG00000197358	BNIP3P1						90	ENSG00000132000	PODNL1
91	ENSG00000172349	IL16		91	ENSG00000174343	CHRNA9		91	ENSG00000135931	ARMC9		91	ENSG00000111674	ENO2						91	ENSG00000137285	TUBB2B
92	ENSG00000131080	EDA2R		92	ENSG00000129910	CDH15		92	ENSG00000140948	ZCCHC14		92	ENSG00000100003	SEC14L2						92	ENSG00000167615	LENG8
93	ENSG00000132932	ATP8A2		93	ENSG00000214900	LINC01588		93	ENSG00000120549	KIAA1217		93	ENSG00000163638	ADAMTS9						93	ENSG00000166793	YPEL4
94	ENSG00000079102	RUNX1T1		94	ENSG00000196611	MMP1		94	ENSG00000249669	CARMN		94	ENSG00000132965	ALOX5AP						94	ENSG00000196123	KIAA0895L
95	ENSG00000211448	DIO2		95	ENSG00000158714	SLAMF8		95	ENSG00000115738	ID2		95	ENSG00000260001	TGFBR3L						95	ENSG00000149090	PAMR1
96	ENSG00000105088	OLFM2		96	ENSG00000069812	HES2		96	ENSG00000056558	TRAF1		96	ENSG00000168334	XIRP1						96	ENSG00000215252	GOLGA8B
97	ENSG00000204103	MAFB		97	ENSG00000214274	ANG		97	ENSG00000167912	AC090152.1		97	ENSG00000118898	PPL						97	ENSG00000255248	MIR100HG
98	ENSG00000156103	MMP16		98	ENSG00000258791	LINC00520		98	ENSG00000138496	PARP9		98	ENSG00000139832	RAB20
99	ENSG00000185745	IFIT1		99	ENSG00000116396	KCNC4		99	ENSG00000067715	SYT1		99	ENSG00000142046	TMEM91
100	ENSG00000078053	AMPH		100	ENSG00000130270	ATP8B3		100	ENSG00000277734	TRAC		100	ENSG00000076662	ICAM3
101	ENSG00000162745	OLFML2B		101	ENSG00000095637	SORBS1		101	ENSG00000145147	SLIT2		101	ENSG00000143248	RGS5
102	ENSG00000112182	BACH2		102	ENSG00000158769	F11R		102	ENSG00000151150	ANK3		102	ENSG00000158825	CDA
103	ENSG00000108984	MAP2K6		103	ENSG00000171236	LRG1		103	ENSG00000210195	MT-TT		103	ENSG00000176171	BNIP3
104	ENSG00000116132	PRRX1		104	ENSG00000025039	RRAGD		104	ENSG00000143995	MEIS1		104	ENSG00000225138	SLC9A3-AS1
105	ENSG00000011677	GABRA3		105	ENSG00000173597	SULT1B1		105	ENSG00000133083	DCLK1		105	ENSG00000069667	RORA
106	ENSG00000108688	CCL7		106	ENSG00000081181	ARG2		106	ENSG00000198743	SLC5A3		106	ENSG00000126562	WNK4
107	ENSG00000151952	TMEM132D		107	ENSG00000115318	LOXL3		107	ENSG00000170049	KCNAB3		107	ENSG00000126218	F10
108	ENSG00000082497	SERTAD4		108	ENSG00000136928	GABBR2		108	ENSG00000279670	AL359922.3		108	ENSG00000130821	SLC6A8
109	ENSG00000171502	COL24A1		109	ENSG00000167077	MEI1		109	ENSG00000090104	RGS1		109	ENSG00000189134	NKAPL
110	ENSG00000198795	ZNF521		110	ENSG00000151572	ANO4		110	ENSG00000049130	KITLG		110	ENSG00000108932	SLC16A6
111	ENSG00000041353	RAB27B		111	ENSG00000179314	WSCD1		111	ENSG00000081041	CXCL2		111	ENSG00000163975	MELTF
112	ENSG00000185559	DLK1		112	ENSG00000124191	TOX2		112	ENSG00000100842	EFS		112	ENSG00000205364	MT1M
113	ENSG00000137959	IFI44L		113	ENSG00000244459	AC147067.1		113	ENSG00000279078	SND1-IT1		113	ENSG00000106537	TSPAN13
114	ENSG00000128602	SMO		114	ENSG00000061656	SPAG4		114	ENSG00000148158	SNX30		114	ENSG00000172366	MCRIP2
115	ENSG00000265579	AC023301.1		115	ENSG00000127561	SYNGR3		115	ENSG00000135333	EPHA7		115	ENSG00000180758	GPR157
116	ENSG00000072657	TRHDE		116	ENSG00000135245	HILPDA		116	ENSG00000119508	NR4A3		116	ENSG00000064300	NGFR
117	ENSG00000125538	IL1B		117	ENSG00000119686	FLVCR2		117	ENSG00000230590	FTX		117	ENSG00000256940	AP001453.2
118	ENSG00000225968	ELFN1		118	ENSG00000181885	CLDN7		118	ENSG00000146232	NFKBIE		118	ENSG00000160318	CLDND2
119	ENSG00000119922	IFIT2		119	ENSG00000114771	AADAC		119	ENSG00000121005	CRISPLD1		119	ENSG00000131386	GALNT15
120	ENSG00000136531	SCN2A		120	ENSG00000071282	LMCD1		120	ENSG00000197321	SVIL		120	ENSG00000158296	SLC13A3
121	ENSG00000153714	LURAP1L		121	ENSG00000149506	ZP1		121	ENSG00000255690	TRIL		121	ENSG00000140939	NOL3
122	ENSG00000089127	OAS1		122	ENSG00000197614	MFAP5		122	ENSG00000102804	TSC22D1		122	ENSG00000278828	HIST1H3H
123	ENSG00000112902	SEMA5A		123	ENSG00000066248	NGEF		123	ENSG00000261455	LINC01003		123	ENSG00000167487	KLHL26
124	ENSG00000147041	SYTL5		124	ENSG00000233452	STXBP5-AS1		124	ENSG00000121068	TBX2		124	ENSG00000059804	SLC2A3
125	ENSG00000128052	KDR		125	ENSG00000099860	GADD45B		125	ENSG00000111885	MAN1A1		125	ENSG00000205362	MT1A
126	ENSG00000136160	EDNRB		126	ENSG00000162433	AK4		126	ENSG00000116128	BCL9		126	ENSG00000129667	RHBDF2
127	ENSG00000145632	PLK2		127	ENSG00000182379	NXPH4		127	ENSG00000134775	FHOD3		127	ENSG00000178773	CPNE7
128	ENSG00000121904	CSMD2		128	ENSG00000187193	MT1X		128	ENSG00000211772	TRBC2		128	ENSG00000122971	ACADS
129	ENSG00000189184	PCDH18		129	ENSG00000106484	MEST		129	ENSG00000142065	ZFP14		129	ENSG00000262165	AC233723.1
130	ENSG00000092969	TGFB2		130	ENSG00000116690	PRG4		130	ENSG00000137507	LRRC32		130	ENSG00000100504	PYGL
131	ENSG00000120594	PLXDC2		131	ENSG00000099377	HSD3B7		131	ENSG00000163629	PTPN13		131	ENSG00000164976	MYORG
132	ENSG00000157601	MX1		132	ENSG00000188820	CALHM6		132	ENSG00000092068	SLC7A8		132	ENSG00000204219	TCEA3
133	ENSG00000107282	APBA1		133	ENSG00000142949	PTPRF		133	ENSG00000115415	STAT1		133	ENSG00000248049	UBA6-AS1
134	ENSG00000183486	MX2		134	ENSG00000138061	CYP1B1		134	ENSG00000205413	SAMD9		134	ENSG00000162817	C1orf115
135	ENSG00000160145	KALRN		135	ENSG00000187210	GCNT1		135	ENSG00000134569	LRP4		135	ENSG00000108852	MPP2
136	ENSG00000183454	GRIN2A		136	ENSG00000184669	OR7E14P		136	ENSG00000084636	COL16A1		136	ENSG00000157510	AFAP1L1
137	ENSG00000107201	DDX58		137	ENSG00000158050	DUSP2		137	ENSG00000229807	XIST		137	ENSG00000231389	HLA-DPA1
138	ENSG00000144369	FAM171B		138	ENSG00000179094	PER1		138	ENSG00000122176	FMOD		138	ENSG00000170379	TCAF2
139	ENSG00000163132	MSX1		139	ENSG00000134013	LOXL2		139	ENSG00000260920	AL031985.3		139	ENSG00000139132	FGD4
140	ENSG00000164161	HHIP		140	ENSG00000162595	DIRAS3		140	ENSG00000111331	OAS3		140	ENSG00000070404	FSTL3
141	ENSG00000182175	RGMA		141	ENSG00000170909	OSCAR		141	ENSG00000072195	SPEG		141	ENSG00000130731	METTL26
142	ENSG00000187608	ISG15		142	ENSG00000198270	TMEM116		142	ENSG00000091428	RAPGEF4		142	ENSG00000069482	GAL
143	ENSG00000122778	KIAA1549		143	ENSG00000169715	MT1E		143	ENSG00000232679	LINC01705		143	ENSG00000235385	LINC02154
144	ENSG00000176887	SOX11		144	ENSG00000267174	AC011472.2		144	ENSG00000139679	LPAR6		144	ENSG00000186352	ANKRD37
145	ENSG00000153707	PTPRD		145	ENSG00000126458	RRAS		145	ENSG00000132003	ZSWIM4		145	ENSG00000226742	HSBP1L1
146	ENSG00000106976	DNM1		146	ENSG00000282988	AL031777.3		146	ENSG00000136378	ADAMTS7		146	ENSG00000088340	FER1L4
147	ENSG00000104951	IL4I1		147	ENSG00000273132	AL355312.3		147	ENSG00000132386	SERPINF1		147	ENSG00000172426	RSPH9
148	ENSG00000181541	MAB21L2		148	ENSG00000167772	ANGPTL4		148	ENSG00000130589	HELZ2		148	ENSG00000137834	SMAD6
149	ENSG00000121858	TNFSF10		149	ENSG00000198771	RCSD1		149	ENSG00000111335	OAS2		149	ENSG00000169750	RAC3
150	ENSG00000107485	GATA3		150	ENSG00000118971	CCND2		150	ENSG00000137558	PI15		150	ENSG00000120899	PTK2B
151	ENSG00000173391	OLR1		151	ENSG00000138356	AOX1		151	ENSG00000120093	HOXB3		151	ENSG00000161638	ITGA5
152	ENSG00000151692	RNF144A		152	ENSG00000178752	ERFE		152	ENSG00000185112	FAM43A		152	ENSG00000171992	SYNPO
153	ENSG00000166342	NETO1		153	ENSG00000187957	DNER		153	ENSG00000225783	MIAT		153	ENSG00000026559	KCNG1
154	ENSG00000236333	TRHDE-AS1		154	ENSG00000148926	ADM		154	ENSG00000137965	IFI44		154	ENSG00000170421	KRT8
155	ENSG00000122870	BICC1		155	ENSG00000132749	TESMIN		155	ENSG00000134769	DTNA		155	ENSG00000108479	GALK1
156	ENSG00000143341	HMCN1		156	ENSG00000006453	BAIAP2L1		156	ENSG00000072832	CRMP1		156	ENSG00000085840	ORC1
157	ENSG00000145242	EPHA5		157	ENSG00000124440	HIF3A		157	ENSG00000206432	TMEM200C		157	ENSG00000179820	MYADM
158	ENSG00000156453	PCDH1						158	ENSG00000099953	MMP11
159	ENSG00000154822	PLCL2						159	ENSG00000236871	LINC00106
160	ENSG00000169744	LDB2						160	ENSG00000169851	PCDH7
161	ENSG00000157240	FZD1						161	ENSG00000101493	ZNF516
162	ENSG00000272398	CD24						162	ENSG00000120659	TNFSF11
163	ENSG00000171408	PDE7B						163	ENSG00000173894	CBX2
164	ENSG00000128482	RNF112						164	ENSG00000272168	CASC15
165	ENSG00000254122	PCDHGB7						165	ENSG00000070882	OSBPL3
166	ENSG00000154864	PIEZO2						166	ENSG00000130164	LDLR
167	ENSG00000161835	GRASP						167	ENSG00000135114	OASL
168	ENSG00000184838	PRR16						168	ENSG00000187479	C11orf96
169	ENSG00000115267	IFIH1						169	ENSG00000140285	FGF7
170	ENSG00000110900	TSPAN11
171	ENSG00000028277	POU2F2
172	ENSG00000185634	SHC4
173	ENSG00000151617	EDNRA
174	ENSG00000164125	FAM198B
175	ENSG00000274422	AC245060.5
176	ENSG00000131773	KHDRBS3
177	ENSG00000087494	PTHLH
178	ENSG00000149212	SESN3
179	ENSG00000138311	ZNF365
180	ENSG00000197594	ENPP1
181	ENSG00000064692	SNCAIP
182	ENSG00000245526	LINC00461
183	ENSG00000099284	H2AFY2
184	ENSG00000146006	LRRTM2
185	ENSG00000077063	CTTNBP2
186	ENSG00000162944	RFTN2
187	ENSG00000105855	ITGB8
188	ENSG00000172403	SYNPO2
189	ENSG00000119866	BCL11A
190	ENSG00000079215	SLC1A3
191	ENSG00000104967	NOVA2
192	ENSG00000119917	IFIT3
193	ENSG00000133110	POSTN
194	ENSG00000166448	TMEM130
195	ENSG00000165633	VSTM4
196	ENSG00000214575	CPEB1
197	ENSG00000165685	TMEM52B
198	ENSG00000143772	ITPKB
199	ENSG00000143494	VASH2
200	ENSG00000164761	TNFRSF11B
201	ENSG00000163618	CADPS
202	ENSG00000096696	DSP
203	ENSG00000264895	AC006141.1
204	ENSG00000139329	LUM
205	ENSG00000121440	PDZRN3
206	ENSG00000172020	GAP43
207	ENSG00000087245	MMP2
208	ENSG00000162490	DRAXIN
209	ENSG00000138650	PCDH10
210	ENSG00000151789	ZNF385D
211	ENSG00000061918	GUCY1B1
212	ENSG00000115963	RND3
213	ENSG00000134247	PTGFRN
214	ENSG00000144445	KANSL1L
215	ENSG00000197380	DACT3
216	ENSG00000277459	AP001527.2
217	ENSG00000146072	TNFRSF21
218	ENSG00000171860	C3AR1
219	ENSG00000196628	TCF4
220	ENSG00000067141	NEO1
221	ENSG00000196562	SULF2
222	ENSG00000257151	PWAR6
223	ENSG00000176049	JAKMIP2
224	ENSG00000212464	SNORA12
225	ENSG00000126970	ZC4H2
226	ENSG00000171877	FRMD5
227	ENSG00000185565	LSAMP
228	ENSG00000165655	ZNF503
229	ENSG00000196569	LAMA2
230	ENSG00000136235	GPNMB
231	ENSG00000158164	TMSB15A
232	ENSG00000254726	MEX3A
233	ENSG00000188064	WNT7B
234	ENSG00000168961	LGALS9
235	ENSG00000135750	KCNK1
236	ENSG00000188158	NHS
237	ENSG00000154188	ANGPT1
238	ENSG00000249784	SCARNA22
239	ENSG00000070961	ATP2B1
240	ENSG00000136859	ANGPTL2
241	ENSG00000120820	GLT8D2
242	ENSG00000169184	MN1
243	ENSG00000151632	AKR1C2
244	ENSG00000067445	TRO
245	ENSG00000140937	CDH11
246	ENSG00000170396	ZNF804A
247	ENSG00000136999	NOV
248	ENSG00000269821	KCNQ1OT1
249	ENSG00000259969	AL049838.1
250	ENSG00000251003	ZFPM2-AS1
251	ENSG00000236609	ZNF853
252	ENSG00000125845	BMP2
253	ENSG00000196460	RFX8
254	ENSG00000152990	ADGRA3
255	ENSG00000138678	GPAT3
256	ENSG00000038427	VCAN
257	ENSG00000170365	SMAD1
258	ENSG00000170500	LONRF2
259	ENSG00000176371	ZSCAN2
260	ENSG00000101825	MXRA5
261	ENSG00000249242	TMEM150C
262	ENSG00000271533	Z83843.1
263	ENSG00000081059	TCF7
264	ENSG00000167157	PRRX2
265	ENSG00000227051	C14orf132
266	ENSG00000229056	AC020571.1
267	ENSG00000125378	BMP4
268	ENSG00000162576	MXRA8
269	ENSG00000164929	BAALC
270	ENSG00000046653	GPM6B
271	ENSG00000122378	FAM213A
272	ENSG00000100968	NFATC4
273	ENSG00000143387	CTSK
274	ENSG00000060718	COL11A1
275	ENSG00000253846	PCDHGA10
276	ENSG00000109472	CPE
277	ENSG00000165323	FAT3
278	ENSG00000157168	NRG1
279	ENSG00000109610	SOD3
280	ENSG00000164938	TP53INP1
281	ENSG00000077942	FBLN1
282	ENSG00000113532	ST8SIA4
283	ENSG00000124225	PMEPA1
284	ENSG00000119042	SATB2
285	ENSG00000188070	C11orf95
286	ENSG00000011347	SYT7
287	ENSG00000152409	JMY
288	ENSG00000123836	PFKFB2
289	ENSG00000117707	PROX1
290	ENSG00000104321	TRPA1
291	ENSG00000168916	ZNF608
292	ENSG00000102409	BEX4
293	ENSG00000154736	ADAMTS5
294	ENSG00000182568	SATB1
295	ENSG00000144730	IL17RD
296	ENSG00000123610	TNFAIP6
297	ENSG00000182916	TCEAL7
298	ENSG00000115252	PDE1A
